# Supplementary material for: Crystallographic and dielectric studies of tetrahedral {NH4@Fe4} crystallized with halomethane molecules
Source: Royal Society of Chemistry journal article supplement (doi:10.1039/d3ce00429e), 2023-01-01
Supplement: d3ce00429e1.pdf [file d3ce00429e1.pdf]

## Methods.

**SC-XRD;** A suitable crystal was selected and mounted on a suitable support on an XtaLAB Synergy R, HyPix diffractometer. The crystal was kept at a steady temperature during data collection. The structure was solved with the ShelXT 2018/2 structure solution program using the Intrinsic Phasing solution method and by using Olex2 as the graphical interface. The model was refined with version 2018/3 of ShelXL 2018/3 using Least Squares minimisation. Further details of the crystallographic analysis are summarised in the CIF file deposited at the CCDC.

| Crystals                              | CCDC number |
|---------------------------------------|-------------|
| <b>1-CHCl<sub>3</sub></b>             | 2258378     |
| <b>1-CHBr<sub>3</sub></b>             | 2281393     |
| <b>1-CH<sub>2</sub>Cl<sub>2</sub></b> | 2279856     |
| <b>1-CH<sub>2</sub>Br<sub>2</sub></b> | 2281391     |

**FTIR spectroscopy;** FT-IR spectra (Nicolet Avatar 370 DTGS, Thermo Fisher) with a resolution of 4 cm<sup>-1</sup> were collected using KBr disks.

**TG;** Thermogravimetric (TG) measurements were performed using a Rigaku Thermo Plus TG8120 instrument under an N<sub>2</sub> flow.

**DSC;** DSC measurements were performed using a Mettler Toledo DSC 1 STAR system.

**Powder XRD;** Measurements were performed using a Rigaku Mini Flex 600 at 2 $\theta$  of 2°–20°.

**Dielectric permittivity measurements;** dielectric permittivity measurements were performed by ac two-probe measurements using pellets. Silver or gold paste was used for electrodes and electrical contacts were made using gold wires. Temperature-dependent dielectric permittivity was measured using an Agilent E4980A Precision LCR meter in an air atmosphere. The typical applied ac voltage was 1 V, and the frequency range was 100 Hz–1 MHz.

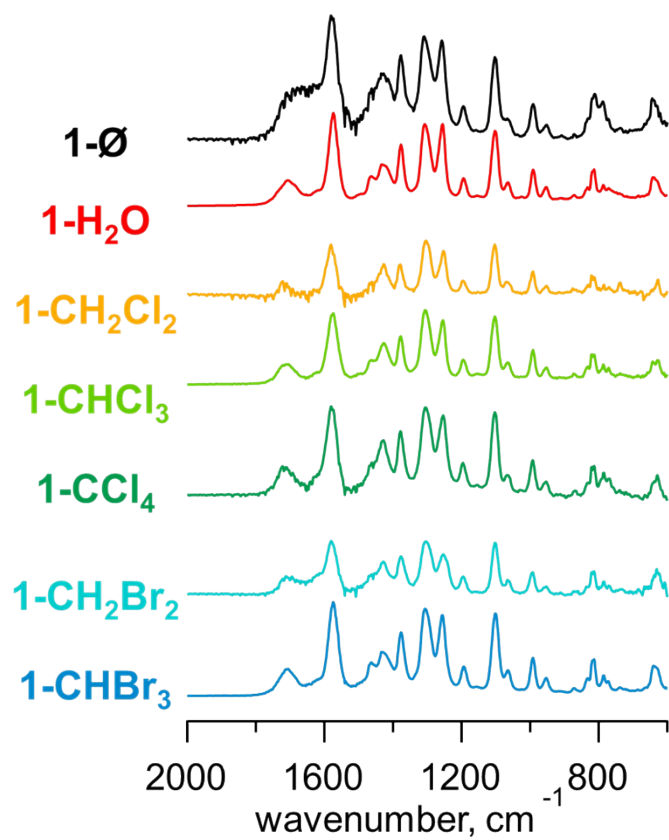

Figure S1. □ FT-IR spectra

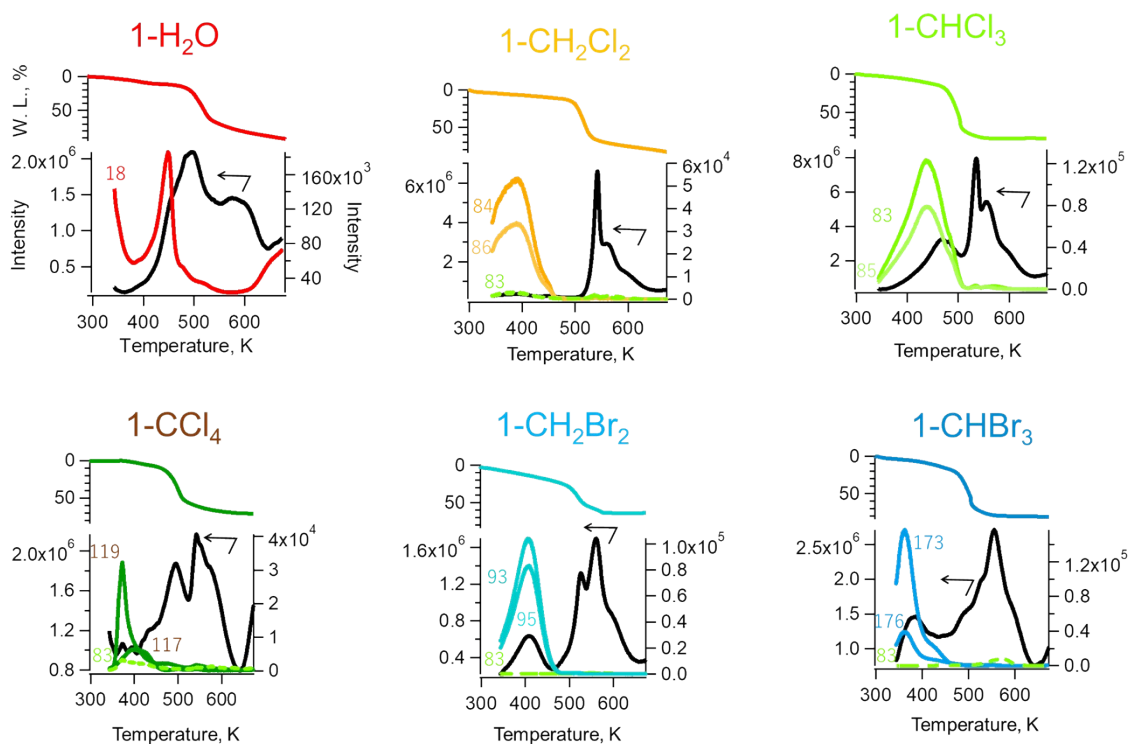

| Compound                        | $m/z$    |           |
|---------------------------------|----------|-----------|
| H <sub>2</sub> O                | 18(100)  |           |
| CH <sub>2</sub> Cl <sub>2</sub> | 84(100)  | 86(39.2)  |
| CHCl <sub>3</sub>               | 83(100)  | 85(65.6)  |
| CCl <sub>4</sub>                | 117(100) | 119(96.0) |
| CH <sub>2</sub> Br <sub>2</sub> | 93(72.4) | 95(62.4)  |
| CHBr <sub>3</sub>               | 173(100) | 176(78.8) |

Figure S2. TG and real-time GC-MS measurements on the gases generated while the sample was heated and table of  $m/z$  of guest molecules.

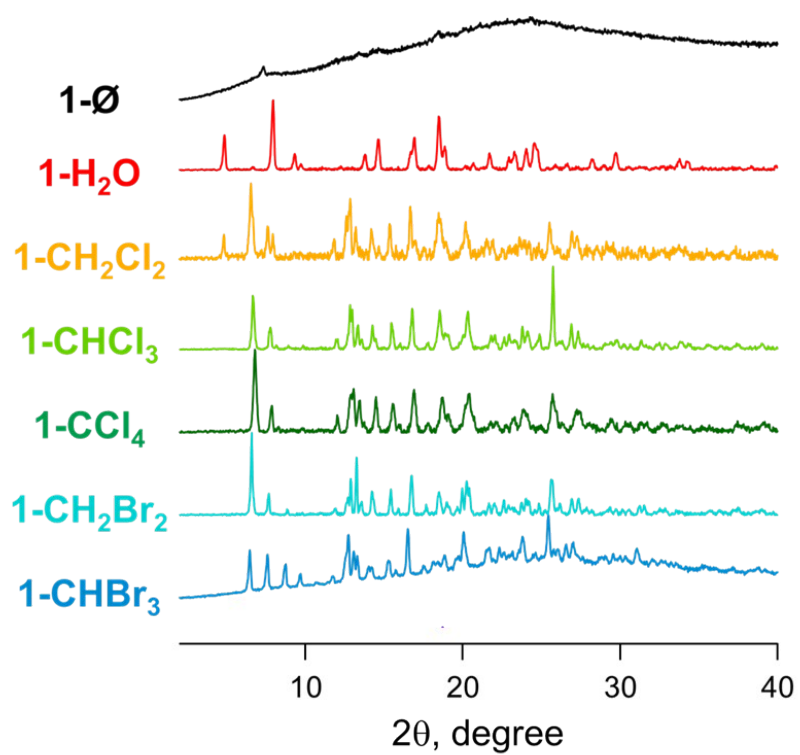

Figure S3. Powder XRD patterns of compounds.

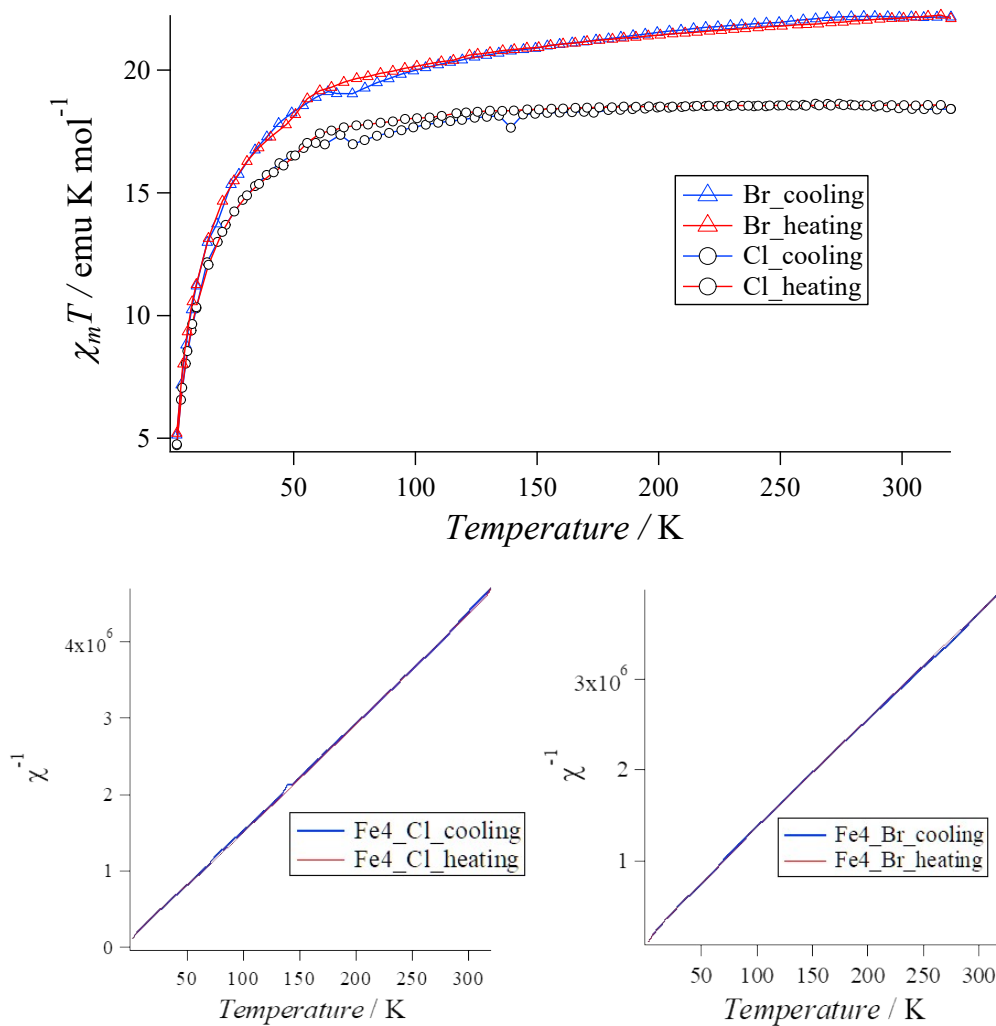

Figure S4. Temperature dependent magnetic susceptibility measurement at 2-310 K of **1-CH<sub>2</sub>X<sub>2</sub>** (X=Cl, Br). Magnetic measurements were performed using a Quantum Design MPMS-5S. The temperature dependence of the molar magnetic susceptibility was measured between 2 and 350 K in an external field of 5,000 Oe. Samples were fixed in polyvinylidene chloride foils for measurements at 5 K/min.

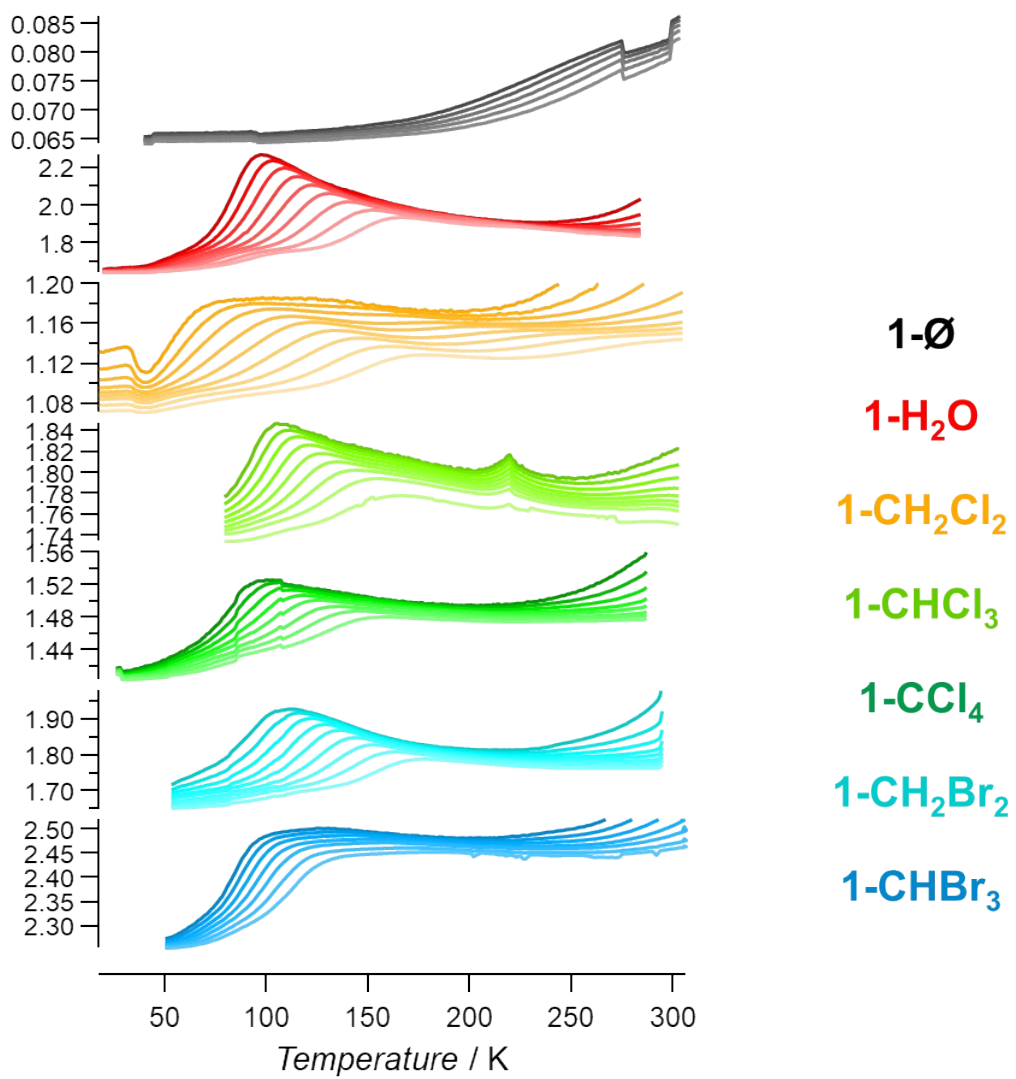

Figure S5. Temperature dependence of real parts of complex permittivity.

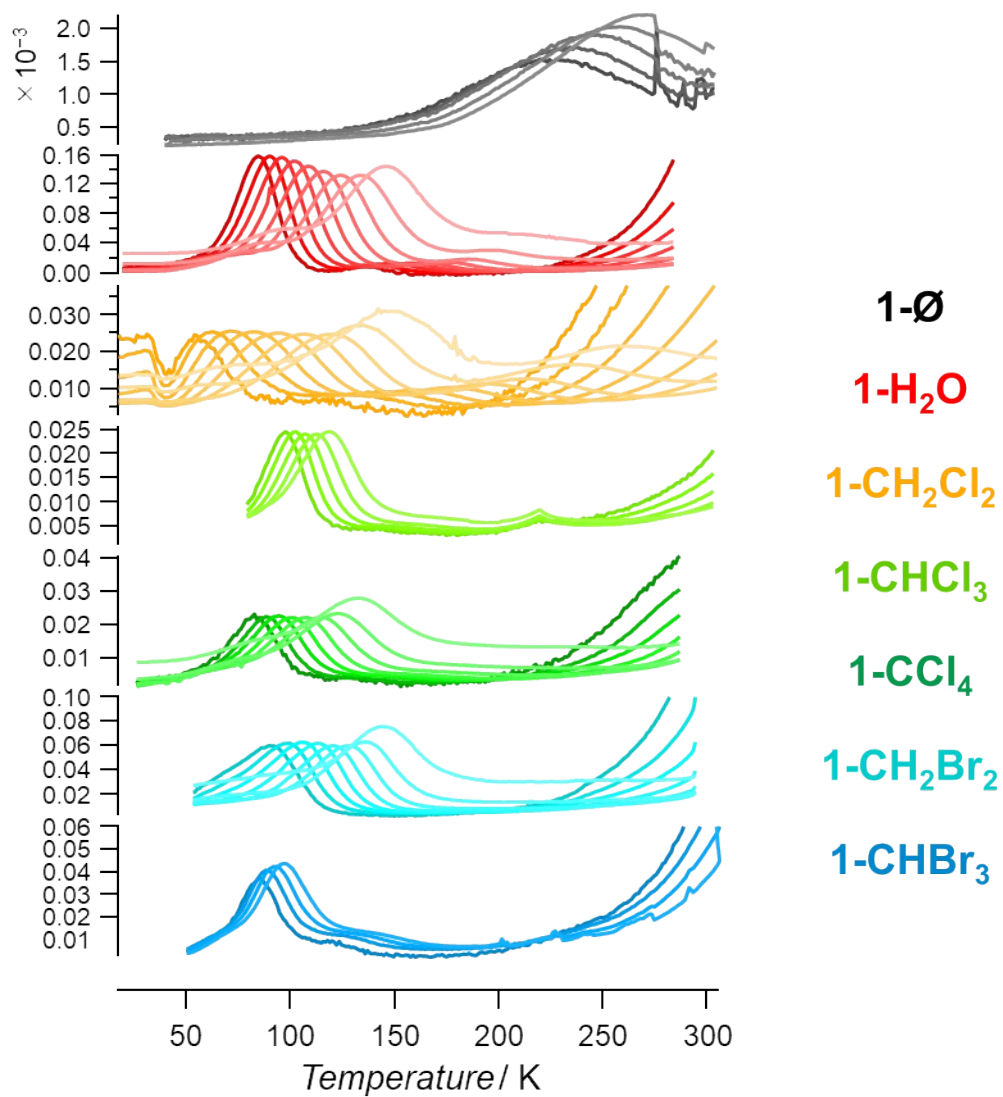

Figure S6. Temperature dependence of imaginary parts of complex permittivity.

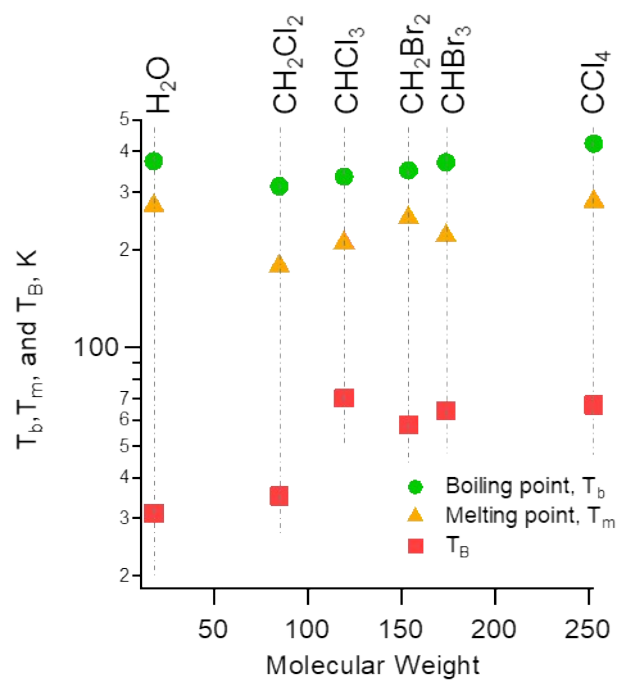

Figure S7. Plot of boiling point ( $T_b$ ), melting point ( $T_m$ ), and temperature at 0.01 Hz in Arrhenius analysis ( $T_B$ ) with molecular weight of the guest.
